# Supplementary material
Source: PubMed Central journal article supplement (PMC6522282)
Supplement: NIHMS1521120-supplement-Supplemental_table.pdf [file NIHMS1521120-supplement-Supplemental_table.pdf]

**Supplementary Table 1** Univariate and multivariate binary Logistic Regression Models for predicting adequate and near perfect PrEP adherence at the last post-trial visit among participants who reported being on PrEP at all four participating centers.

| <b>Variables for Predicting Post-Trial PrEP Adherence (n=95)</b>                     | <b>OR</b>               | <b>95% CI</b> | <b>p value</b> | <b>aOR</b>                | <b>95% CI</b> | <b>p value</b> |
|--------------------------------------------------------------------------------------|-------------------------|---------------|----------------|---------------------------|---------------|----------------|
|                                                                                      | <b>Univariate Model</b> |               |                | <b>Multivariate Model</b> |               |                |
| <b>Variables for Predicting Adequate PrEP Adherence at the last post-trial visit</b> |                         |               |                |                           |               |                |
| Intervention Arm (i.e. receiving daily text messages for PrEP adherence)             | 1.257                   | 0.489 – 3.235 | 0.635          |                           |               |                |
| Study Site other than UCSD                                                           | 0.440                   | 0.155 – 1.250 | 0.123          | -                         | -             | n.s.           |
| Age (per year)                                                                       | 1.015                   | 0.967 – 1.065 | 0.553          |                           |               |                |
| Hispanic ethnicity                                                                   | 1.318                   | 0.408 – 4.260 | 0.644          |                           |               |                |
| Higher Education category                                                            | 1.173                   | 0.793 – 1.733 | 0.424          |                           |               |                |
| Higher Income category                                                               | 1.121                   | 0.871 – 1.44  | 0.375          |                           |               |                |
| Duration on PrEP trial (per day)                                                     | 1.004                   | 1.000 – 1.007 | 0.051          | -                         | -             | n.s.           |
| Adequate Adherence Week 48 PrEP trial Study visit                                    | 9.196                   | 2.150 – 39.34 | 0.003          | 9.059                     | 2.117 – 38.77 | 0.003          |
| Drug Abuse Screening Test (DAST10; per score point)                                  | 0.761                   | 0.565 – 1.027 | 0.074          | -                         | -             | n.s.           |
| Stimulant Substance Use                                                              | 0.792                   | 0.294 – 2.134 | 0.644          |                           |               |                |
| Non-stimulant Substance Use (alcohol, marijuana and poppers excluded)                | 1.497                   | 0.583 – 3.842 | 0.401          |                           |               |                |

|                                                                                                     |       |                 |   |        |       |                 |             |
|-----------------------------------------------------------------------------------------------------|-------|-----------------|---|--------|-------|-----------------|-------------|
| Popper use                                                                                          | 1.192 | 0.471<br>3.018  | - | 0.711  |       |                 |             |
| Alcohol Use Disorders Identification Test (AUDIT; per score point)                                  | 0.967 | 0.895<br>1.044  | - | 0.390  |       |                 |             |
| Calculated HIV risk score (CalcR) Month                                                             | 2.063 | 0.037<br>115.6  | - | 0.724  |       |                 |             |
| <b>Model 3: Variables for Predicting Near Perfect PrEP Adherence at the last post-trial visit #</b> |       |                 |   |        |       |                 |             |
| Intervention Arm (i.e. receiving daily text messages for PrEP adherence)                            | 1.864 | 0.785<br>4.427  | - | 0.158  | -     | -               | n.s.        |
| Study Site other than UCSD                                                                          | 0.808 | 0.278<br>2.350  | - | 0.695  |       |                 |             |
| Age (per year)                                                                                      | 1.044 | 0.999<br>1.092  | - | 0.057  | -     | -               | n.s.        |
| Hispanic Ethnicity                                                                                  | 0.833 | 0.273<br>2.544  | - | 0.749  |       |                 |             |
| Higher Education category                                                                           | 0.887 | 0.619<br>1.271  | - | 0.514  |       |                 |             |
| Higher Income category                                                                              | 1.188 | 0.920<br>1.533  | - | 0.187  | -     | -               | n.s.        |
| Duration on PrEP trial (per day)                                                                    | 1.003 | 0.999<br>1.008  | - | 0.121  | -     | -               | n.s.        |
| Near perfect Adherence Week 48 PrEP trial Study visit                                               | 6.494 | 2.421<br>17.414 | - | <0.001 | 6.078 | 2.256<br>16.372 | -<br><0.001 |
| Drug Abuse Screening Test (DAST10; per score point)                                                 | 0.910 | 0.673<br>1.230  | - | 0.538  |       |                 |             |
| Stimulant Substance Use                                                                             | 0.772 | 0.294<br>2.025  | - | 0.772  |       |                 |             |
| Non-stimulant Substance Use (alcohol, marijuana and poppers excluded)                               | 0.855 | 0.361<br>2.027  | - | 0.723  |       |                 |             |

|                                                                          |        |                |   |       |   |   |   |
|--------------------------------------------------------------------------|--------|----------------|---|-------|---|---|---|
| Popper use                                                               | 0.703  | 0.295<br>1.680 | - | 0.428 |   |   |   |
| Alcohol Use Disorders<br>Identification Test (AUDIT;<br>per score point) | 0.972  | 0.893<br>1.057 | - | 0.506 |   |   |   |
| Calculated HIV risk score<br>(CalcR) Month                               | 11.292 | 0.333<br>383.4 | - | 0.178 | - | - | - |
